# Supplementary material for: Age-related connectivity differences between attention deficit and hyperactivity disorder patients and typically developing subjects: a resting-state functional MRI study
Source: PubMed Central journal article supplement — Neural Regen Res. 2017 Oct;12(10):1640–7. doi: 10.4103/1673-5374.217339 (PMC5696845; doi:10.4103/1673-5374.217339), 2017-10
Supplement: NRR-12-1640_Suppl1.pdf [file NRR-12-1640_Suppl1.pdf]

**Open peer review report 1 on “Neurological and neuropsychological consequences of electrical and lightning shock: review and theories of causation”.**

**Reviewer:** Gentian Vyshka, University of Medicine in Tirana, Albania

**Comments to the authors:** This manuscript used rs-fMRI to explore age-related brain network differences and indicate that aberrant development in cognitive brain regions might be associated with age-related brain network changes in ADHD patients. It indeed has a certain novelty and is a good work in neuroimaging field, but more or less doesn't conform to the scope of the NRR. Anyway, it still needs some revisions as follows:

1. Page 4, line 21, "DSM-IV" is an abbreviation, please provide its full name. And provide the cited reference of "Conner's Parent Rating Scale Revised".
2. The imaging parameters used in KKI and NYU, and HCP database were inconsistent. So would it affect the reliability of the results? If so, how to avoid or reduce this difference?
3. There are two charts in Fig. 1 a or b, which one indicates the result after removal of the frames? Please mark it.
4. Both Fig. 2 description in the results section and its caption missed the direction "Left".
5. The left or right direction should be marked in Fig. 2 and 3.
6. The first paragraph in discussion section is still a part of results, so it should be moved in this section.
7. This paper lacked further discussion. It would be better if the author can propose a possible mechanism to explain their findings.
